# Supplementary material
Source: publisher figshare collection journal article supplement (https://geolsoc.figshare.com/ndownloader/files/26105067)
Supplement: Supplementary file 1 [file 26105067]

## Sheet: Contents
Testing the relationship between marine transgression and evolving island palaeogeography using 3D GIS: an example from the Late Triassic of SW England
Jack Lovegrove1, Andrew J. Newell2, David I. Whiteside1,3 and Michael J. Benton1*
Contents
Table S1. Literature localities
Table S2. Borehole records
Table S3. Fissure heights
Table S4. Island faunas
Table S5. Tallies of species and island areas
Table S6. Graph of island area vs. species counts

## Sheet: S1. Literature localites
Locality	altitude	Carboniferous	Mercia	Westbury	Cotham	Reference/Memoir title		lat	long
Chipping sodbury barnhill quarry	110	104.5	N/A	104.5	108.3	Reynolds 1938		51.547	-2.39855
Dunball cutting	14	N/A	0.39	0.39	10.34	Richardson 1911		51.1668	-2.98281			Key to spread sheets All heights given in metres above sea level Carboniferous= height of the top of the carboniferous/paleozoic sedments Mercia=height of the top of the Mercia Mudstone Group Westbury=height of base of the Westbury formation Cotham=height of the top of the Cotham formation
Dunkerton colliery	71	N/A	69.12	69.12	70.99	Richardson 1911		51.3246	-2.43736
kelton station	38	N/A	32.4	32.4	33.36	Winwood 1884		51.399	-2.44579
Holwell	125	124.09	N/A	124.09	124.7	Richardson 1911		51.2024	-2.39188
shepton mallet	151	N/A	136.53	136.53	141.28	Richardson 1911		51.1953	-2.5451
chilcompton	161	N/A	156.61	156.61	159.99	Richardson 1911		51.2674	-2.49977
M4/M5 225	63	N/A	57.4	57.4	57.4	Slater 2016		51.5301	-2.60212
M4/M5 120	87	N/A	74.95	74.95	80.1	Slater 2016		51.5465	-2.57007
M4/M5 186	61	N/A	53.9	53.9	59.05	Slater 2016		51.5436	-2.54552
Pyle hill	48	N/A	39.43	39.43	44.25	Wilson-1981		51.444	-2.5819
M4/M5 114.9	78	N/A	71.9	71.9	78.7	Slater 2016		51.5327	-2.59461
Manor farm quarry	29	N/A	22.5	22.5	29	Allard 2015		51.6043	-2.615
M4/M5 226	67	N/A	55.3	55.3	62.2	Slater 2016		51.5275	-2.61348
M4/M5 38	52	N/A	42.95	42.95	48.85	Slater 2016		51.5562	-2.53941
M4/M5 35.5	61	N/A	51.9	51.9	58.4	Slater 2016		51.5608	-2.53416
M4/M5 39	63	N/A	53.9	53.9	61.3	Slater 2016		51.5546	-2.54236
M4/M5 35	70	N/A	64.6	64.6	71.2	Slater 2016		51.5727	-2.52483
willsbridge	53	34.76	42.43	42.43	N/A	Moore 1867		51.4336	-2.47692
Windsor hill	151	150.7	N/A	N/A	N/A	Moore 1867		51.1955	-2.54491
vallis vale	83	78.13	N/A	78.13	N/A	Richardson 1911		51.2417	-2.35195
hapsford mills	81	66.16	N/A	66.16	N/A	Richardson 1911		51.2434	-2.34507
Uphill railway cutting	20	N/A	18.33	18.33	N/A	Richardson 1911		51.3178	-2.96762
Coldharbour road, ST albans road	78	N/A	N/A	74.927	N/A	Short 1904		51.4779	-2.60789
Coldharbour road	80	76.33	N/A	76.43	N/A	Short 1904		51.4831	-2.59974
Coldharbour	75	69.5	70.69	70.69	N/A	Short 1904		51.4804	-2.60552
Cotham house	75	N/A	N/A	70.43	N/A	Short 1904		51.462	-2.60387
ashley down ST57 NE11	60	N/A	-14.676	24.04	N/A	Geology of the Bristol district		51.4773	-2.57764
Bowlish ST64/SW	115.98	79.38	79.38	92.51	N/A	Geology of the country around Wells and Cheddar		51.1935	-2.56092
Cheddar	59.13	-97.84	N/A	N/A	N/A	Geology of the country around Wells and Cheddar		51.2914	-2.79128
Banwell spring ST53/NE	5.79	-14.32	N/A	N/A	N/A	Geology of the country around Wells and Cheddar		51.3285	-2.86469
East harptree	269	183.4	N/A	N/A	N/A	Geology of the country around Wells and Cheddar		51.2793	-2.65989
Patchway ST68 Sw 54	57.9	N/A	N/A	51.804	N/A	Geology of the Bristol district		51.5258	-2.56744
sand hamlet	50	N/A	N/A	47.714	N/A	Geology of the country around Wells and Cheddar		51.2202	-2.82185
weare	19	N/A	N/A	16.26	N/A	Geology of the country around Wells and Cheddar		51.2678	-2.83416

## Sheet: S2. Borehole records
Borehole	Altitude	Carboniferous	Mercia	Westbury	Cotham
ST75NW6	87.8125	51.0125	59.3625	59.3625	62.2125
ST56NE7	56.89	N/A	34.43	34.43	39.23
ST56NW26	143.303	N/A	125.933	125.933	128.223
ST65NE10	143.24	75.422	124.58	124.58	129.524
ST55NE5	62.1075	N/A	31.7775	31.7775	50.8375
ST35NE15	18.075	N/A	N/A	7.10502	10.755
ST55SW6	272.753	267.273	N/A	259.037	267.273
ST67SE24	75.3625	N/A	68.5325	68.5325	72.7725
ST65SW4	205.607	119.857	199.567	199.567	203.127
ST77NW26	103.112	89.1125	N/A	89.1125	102.112
ST67SE25	106.88	N/A	103.35	103.35	105.88
ST78SW13	108.817	80.5675	101.147	101.147	107.817
ST77NW2	103.112	97.3625	N/A	97.3625	102.362
ST76NW31	25.866	-37.754	23.556	23.556	N/A
ST47SE58	6.0125	-0.387502	N/A	N/A	N/A
ST57SW9	8.77501	-10.425	5.73501	N/A	N/A
ST46NE10	19.1825	-80.4175	N/A	N/A	N/A
ST58SW41	20.0887	-31.7213	-4.29125	N/A	N/A
ST46SE3	21.1725	-0.767503	N/A	N/A	N/A
ST45SE17	36.95	-21.27	N/A	N/A	N/A
ST56SE6	58.1325	-2.8275	N/A	N/A	N/A
ST57NE2	60.33	58.51	60.03	N/A	N/A
ST56NW31	118.835	35.935	N/A	N/A	N/A
ST64SW27	143	130.808	N/A	N/A	N/A
ST45NW4	151.643	147.023	N/A	N/A	N/A
ST56NW30	158.588	130.548	N/A	N/A	N/A
ST55NE2	159.995	96.195	157.555	N/A	N/A
Borehole	Carboniferous	Mercia	Westbury	Cotham	altitude	Source
borehole1	-29.4	28.931	28.932	36.58	39.6	Whittard 1948
borehole2	-23.46	N/A	N/A	N/A	0	Whittard 1948
borehole36	-15.84	N/A	N/A	N/A	0	Whittard 1948
borehole16	0.44	N/A	N/A	N/A	17.5	Whittard 1948
borehol34	-1.39	1.74	N/A	N/A	8.59	Whittard 1948

## Sheet: S3. Fissure heights
Locality	UK grid reference	Paleozoic top	Westbury base	Cotham top
Cromhall	ST 704 916	83	72	80
Tytherington	ST 660 890	101	90	107
Woodleaze	ST657 885	98	93	104
Durdham Down	ST573 747	95	90	97
Emborough	ST 623 505	213	211	216
Batscombe	ST 460 550	201	149	158
Windsor Hill	ST 615 452	201	158	154
Holwell	ST 727 452	126	129	132
Highcroft	ST 62018 48602	226	208	209
				All heights in metres

## Sheet: S4. Island faunas
	Locality	Cromhall-C	Cromhall fissure site 1	Tytherington-C	Tytherington fiss 2 Ex 17m	Woodleaze-C	Durdham Down	Emborough-E	Batscombe-E	Pant-y-ffynnon	Twyn-yr-Odyn	Ruthin	Holwell-E	Holwell microlestes only	Windsor Hill-E	Locality	St. Brides Pant 4	St. Brides (M)	St. Brides (M-S)	DD	CTPI	MPI	SB
Terrestrial faunas	Gephyrosaurus												1	1		Gephyrosaurus	1	1	1	6	19	23	12	Min
	Penegephyrosaurus curtiscoppi												1	1		Penegephyrosaurus curtiscoppi
	Clevosaurus convallis															Clevosaurus convallis	1		1	7	20	27*( 29)	12	Max
	Clevosaurus hudsoni or Clevosaurus sp.	1	1	1	1	1	1	1		1			1			Clevosaurus hudsoni or Clevosaurus sp.					All taxa identified on the island
	Clevosaurus minor	1														Clevosaurus minor					*MPI 27 includes Oligokyphus from WH
	Clevosaurus sectumsemper			1												Clevosaurus sectumsemper					Additionally MPI is 28 with Psephoderma and 29 with Pachystropheus
	Diphydontosaurus	1	1	1	1	1	1			1		1	1	1		Diphydontosaurus
	Planocephalosaurus	1		1	1		?			?		1				Planocephalosaurus
	Pelecymala	1		1												Pelecymala
	Fraserophenodon	1														Fraserophenodon
	Sigmala	1		1												Sigmala
	Other unidentified lepidosaurs			1		?		1		2		1	4	4		Other unidentified lepidosaurs			1
	Indet. Small reptile												1	1		Indet. Small reptile
	Kuehneosaur	1								?						Kuehneosaur					CONFIRMED TAXA ONE FISSURE ONLY
	Kuehneosaurus							1								Kuehneosaurus					DD	C fiss 1	T fiss 2	H Microlestes
	Kuehneosuchus								1							Kuehneosuchus					6	5	8	16
	Archosaur indet.	1		1				1					2	1		Archosaur indet.								18 with Psephoderma and Pachystropheus
	Thecodontosaurus/Pantydraco			1	1		1			1		?	1	1		Thecodontosaurus/Pantydraco
	Theropod/coelophysoid	1		1	1		1			1		?				Theropod/coelophysoid	1		1
	Sphenosuchiid/aff. Terrestrisuchus	1	1	1	1		1			1		1				Sphenosuchiid/aff. Terrestrisuchus	1		1
	Thecodont/suchian/scleromochlid/Agnosphitys	1	1	1	1					1						Thecodont/suchian/scleromochlid/Agnosphitys
	“Palaeosaurus”/phytosaur aff. Nicrosaurus/ Angistorhinopsis			1	1		1					?	1	1		“Palaeosaurus”/phytosaur aff. Nicrosaurus/ Angistorhinopsis
	Aetosaur	1														Aetosaur
	Drepanosaur	1		1												Drepanosaur
	Pterosaur	?		?												Pterosaur	1	1	1
	Tricuspisaurus/Variodens							1				1	1	1		Tricuspisaurus/Variodens
	Procolophonid	1	1	1								4	1	1		Procolophonid
	Oligokyphus														1	Oligokyphus	1		1
	Other tritylodont												1			Other tritylodont
	Pseudotriconodon												1	1		Pseudotriconodon
	Morganucodon and Eozostrodon												1	0		Morganucodon and Eozostrodon	1	1	1
	Kuehneotherium							1								Kuehneotherium	1	1	1
	Bridetherium and Paceyodon															Bridetherium and Paceyodon	2		2
	Theroteinid												1			Theroteinid
	Haramiyid/Thomasia												2	2		Haramiyid/Thomasia	1		1
	Psephoderma												1	1		Psephoderma
	Pachystropheus												1	1		Pachystropheus
Aquatic faunas	Pholidophorus/Legnonotus/Semionotus	1		1							1		1			Pholidophorus/Legnonotus/Semionotus
	Gyrolepis	1		1									1			Gyrolepis
	Severnichthys	1		1									1		1	Severnichthys
	Lissodus*	1		?			1						1		1	Lissodus*
	Rhomphaiodon											1				Rhomphaiodon
	Polyacrodus											1				Polyacrodus
	Unidentified osteichthyan teeth			1		1	1									Unidentified osteichthyan teeth
	Gastropods	?		1									1			Gastropods		1
	Euestheria	1		1						1						Euestheria
	Terrestrial arthropods	1														Terrestrial arthropods		1
	Reworked Carboniferous fossils	1		1		1	1					1				Reworked Carboniferous fossils		1	1
	Minimum number of identified terrestrial genera	15	5	14	8	2	6	5	1	8	0	9	19	16	1	Minimum number of identified terrestrial genera	11	4	11
	Number of possible terrestrial genera present	16		16		3	7	6	1	10	0	12	21		1	Number of possible terrestrial genera present		4	12
													21 minimum	18		With Pachystropheus and Psephoderma
													23 maximum			With Pachystropheus and Psephoderma

## Sheet: S5. Tallies
				Information used for table 1 and Fig. 17. Data for Cromhall fissure 1 is from Fraser 1994; Tytherington fiss. 2 at Ex. 17 is from Mussini et al. 2020; DFPI is from Foffa et al. 2014; PI Microlestes fissure is
Taxa totals from all fissures in locality.				from Whiteside et al. 2016 and Whiteside and Duffin 2017; Pant-y-ffynnon is from Keeble et al. 2017; Ruthin is from Skinner et al. 2020; and St. Brides is from Whiteside et al. 2016.
Cromhall, Tytherington and Woodleaze are
all assumed to be on a continuous CTPI in this table.					One main fissure only confirmed taxa
Area(GIS based)	Min Taxa	Max taxa	Locality	Area in Skinner et al. 2020	Area(GIS based)	Minimum	Maximum
15.5158	13	14	Cromhall	N/A	0.72	5	5	Cromhall PI Fiss 1
15.5158	12	14	Tytherington	N/A	6.89	8	8	Tytherington PI Fiss 2
15.5158	2	3	Woodleaze	22*	26.14	6	7	DFPI
26.14	6	7	Durdham Down	112*	146.35	16	18	MPI Microlestes Q only
146.35	18	20	Holwell	16*	16	8	10	Pant-y-ffynnon
146.35	1	1	Windsor Hill	34*	34	9	12	Ruthin
146.35	6	6	Emborough	15*	15	11	11	Pant 4
146.35	1	1	Batscombe
15	11	12	Pant		N.B. Areas for PyF, Ruthin and St. Brides are not GIS based.
					Areas for Cromhall PI and Tytherington PI are in the Cotham and Westbury respectively. Area for DFPI excludes Clevedon/Portishead Carb. Lst. outcrop.
Summary of all fissures on palaeo-island					All others are in the Lower Rhaetian except St. Brides which is probably hettangian or Sinemurian.
Area(GIS based)	Min Taxa	Max taxa	Island		*Foffa et al. 2014 and Whiteside et al. 2016 island area data used.
15.5158	19	20	CTPI		Ruthin is dated as basal Westbury by Skinner et al.(2020), Pant-y-ffynnon is Late Westbury-Cotham (Keeble et al. 2017), St. Brides is Latest Triassic to Sinmemurian (Whiteside
26.14	6	7	DFPI		et al. (2016).
146.35	23	29	MPI
16	8	10	Pant-y-ffynnon
34	9	12	Ruthin
15	11	12	St. Brides
N.B. PyF, Ruthin and St. Brides are not GIS based.
